# Supplementary material
Source: publisher figshare collection journal article supplement (https://acs.figshare.com/ndownloader/files/5217658)
Supplement: Supplementary file 1 [file 5217658]

# crambescidin core acid 9
# (our ref LEO119)
data_ja042875plus
_audit_creation_method            SHELXTL
_chemical_name_systematic
;
  ?
;
_chemical_name_common             ?
_chemical_melting_point           ?
_chemical_formula_moiety          ?
_chemical_formula_sum
  'C23 H37 N3 O5'
_chemical_formula_weight          435.56

loop_
  _atom_type_symbol
  _atom_type_description
  _atom_type_scat_dispersion_real
  _atom_type_scat_dispersion_imag
  _atom_type_scat_source
  'C'  'C'   0.0033   0.0016
  'International Tables Vol C Tables 4.2.6.8 and 6.1.1.4'
  'H'  'H'   0.0000   0.0000
  'International Tables Vol C Tables 4.2.6.8 and 6.1.1.4'
  'N'  'N'   0.0061   0.0033
  'International Tables Vol C Tables 4.2.6.8 and 6.1.1.4'
  'O'  'O'   0.0106   0.0060
  'International Tables Vol C Tables 4.2.6.8 and 6.1.1.4'

_symmetry_cell_setting            Orthorhombic
_symmetry_space_group_name_H-M    P2(1)2(1)2(1)

loop_
  _symmetry_equiv_pos_as_xyz
  'x, y, z'
  '-x+1/2, -y, z+1/2'
  '-x, y+1/2, -z+1/2'
  'x+1/2, -y+1/2, -z'

_cell_length_a                    9.4999(5)
_cell_length_b                    12.0440(6)
_cell_length_c                    19.6947(9)
_cell_angle_alpha                 90.00
_cell_angle_beta                  90.00
_cell_angle_gamma                 90.00
_cell_volume                      2253.40(19)
_cell_formula_units_Z             4
_cell_measurement_temperature     173(2)
_cell_measurement_reflns_used     ?
_cell_measurement_theta_min       ?
_cell_measurement_theta_max       ?

_exptl_crystal_description        prism
_exptl_crystal_colour             colorless
_exptl_crystal_size_max           0.26
_exptl_crystal_size_mid           0.22
_exptl_crystal_size_min           0.19
_exptl_crystal_density_meas       none
_exptl_crystal_density_diffrn     1.284
_exptl_crystal_density_method     'not measured'
_exptl_crystal_F_000              944
_exptl_absorpt_coefficient_mu     0.090
_exptl_absorpt_correction_type    none
_exptl_absorpt_correction_T_min   0.9769
_exptl_absorpt_correction_T_max   0.9830
_exptl_absorpt_process_details    ?

_exptl_special_details
;
  ?
;

_diffrn_ambient_temperature       173(2)
_diffrn_radiation_wavelength      0.71073
_diffrn_radiation_type            MoK\a
_diffrn_radiation_source          'sealed tube'
_diffrn_radiation_monochromator   graphite
_diffrn_measurement_device_type   'CCD area detector'
_diffrn_measurement_method        'omega scans'
_diffrn_detector_area_resol_mean  ?
_diffrn_standards_number          '50 frames'
_diffrn_standards_interval_count  'initial 50 frames recollected'
_diffrn_standards_interval_time   ?
_diffrn_standards_decay_%         '< 1.0'
_diffrn_reflns_number             24426
_diffrn_reflns_av_R_equivalents   0.0512
_diffrn_reflns_av_sigmaI/netI     0.0453
_diffrn_reflns_limit_h_min        -12
_diffrn_reflns_limit_h_max        12
_diffrn_reflns_limit_k_min        -15
_diffrn_reflns_limit_k_max        15
_diffrn_reflns_limit_l_min        -25
_diffrn_reflns_limit_l_max        25
_diffrn_reflns_theta_min          1.98
_diffrn_reflns_theta_max          28.29
_reflns_number_total              5449
_reflns_number_gt                 4304
_reflns_threshold_expression      >2sigma(I)

_computing_data_collection        'Bruker SMART'
_computing_cell_refinement        'Bruker SMART/SAINT'
_computing_data_reduction         'Bruker SHELXTL'
_computing_structure_solution     'Bruker SHELXTL'
_computing_structure_refinement   'Bruker SHELXTL'
_computing_molecular_graphics     'Bruker SHELXTL'
_computing_publication_material   'Bruker SHELXTL'

_refine_special_details
;
  Refinement of F^2^ against ALL reflections.  The weighted R-factor wR and
  goodness of fit S are based on F^2^, conventional R-factors R are based
  on F, with F set to zero for negative F^2^. The threshold expression of
  F^2^ > 2sigma(F^2^) is used only for calculating R-factors(gt) etc. and is
  not relevant to the choice of reflections for refinement.  R-factors based
  on F^2^ are statistically about twice as large as those based on F, and R-
  factors based on ALL data will be even larger.
;

_refine_ls_structure_factor_coef  Fsqd
_refine_ls_matrix_type            full
_refine_ls_weighting_scheme       calc
_refine_ls_weighting_details
  'calc w=1/[\s^2^(Fo^2^)+(0.0300P)^2^+0.4320P] where P=(Fo^2^+2Fc^2^)/3'
_atom_sites_solution_primary      direct
_atom_sites_solution_secondary    difmap
_atom_sites_solution_hydrogens    geom
_refine_ls_hydrogen_treatment     mixed
_refine_ls_extinction_method      SHELXTL
_refine_ls_extinction_coef        0.0051(6)
_refine_ls_extinction_expression
  'Fc^*^=kFc[1+0.001xFc^2^\l^3^/sin(2\q)]^-1/4^'
_refine_ls_abs_structure_details
  'Flack H D (1983), Acta Cryst. A39, 876-881'
_refine_ls_abs_structure_Flack    0.6(9)
_refine_ls_number_reflns          5449
_refine_ls_number_parameters      429
_refine_ls_number_restraints      0
_refine_ls_R_factor_all           0.0620
_refine_ls_R_factor_gt            0.0376
_refine_ls_wR_factor_ref          0.0852
_refine_ls_wR_factor_gt           0.0744
_refine_ls_goodness_of_fit_ref    1.060
_refine_ls_restrained_S_all       1.060
_refine_ls_shift/su_max           0.000
_refine_ls_shift/su_mean          0.000

loop_
  _atom_site_label
  _atom_site_type_symbol
  _atom_site_fract_x
  _atom_site_fract_y
  _atom_site_fract_z
  _atom_site_U_iso_or_equiv
  _atom_site_adp_type
  _atom_site_occupancy
  _atom_site_symmetry_multiplicity
  _atom_site_calc_flag
  _atom_site_refinement_flags
  _atom_site_disorder_assembly
  _atom_site_disorder_group
O1 O 0.58226(12) 0.49324(10) 0.17909(5) 0.0229(3) Uani 1 1 d . . .
O2 O 0.60259(12) 0.07278(10) 0.11953(5) 0.0232(3) Uani 1 1 d . . .
O3 O 1.01651(15) 0.21920(10) 0.06019(7) 0.0354(3) Uani 1 1 d . . .
O4 O 1.02857(14) 0.03931(10) 0.03543(6) 0.0320(3) Uani 1 1 d . . .
O5 O 0.9797(2) -0.17328(16) 0.07532(13) 0.0797(7) Uani 1 1 d . . .
N1 N 0.68488(16) 0.41165(11) 0.08119(7) 0.0220(3) Uani 1 1 d . . .
N2 N 0.78141(15) 0.28242(11) 0.15497(7) 0.0219(3) Uani 1 1 d . . .
N3 N 0.68662(16) 0.22423(11) 0.05311(7) 0.0223(3) Uani 1 1 d . . .
C1 C 0.3504(2) 0.33420(16) 0.17314(12) 0.0352(5) Uani 1 1 d . . .
C2 C 0.3386(2) 0.45701(16) 0.19136(10) 0.0319(4) Uani 1 1 d . . .
C3 C 0.44651(18) 0.52770(15) 0.15457(9) 0.0259(4) Uani 1 1 d . . .
C4 C 0.4258(2) 0.65055(15) 0.16746(10) 0.0324(4) Uani 1 1 d . . .
C5 C 0.5250(2) 0.72728(16) 0.16437(10) 0.0356(5) Uani 1 1 d . . .
C6 C 0.6743(2) 0.71188(16) 0.14257(10) 0.0322(4) Uani 1 1 d . . .
C7 C 0.6990(2) 0.61234(15) 0.09519(9) 0.0268(4) Uani 1 1 d . . .
C8 C 0.69575(18) 0.50001(14) 0.13202(8) 0.0230(4) Uani 1 1 d . . .
C9 C 0.82671(19) 0.48078(15) 0.17403(9) 0.0257(4) Uani 1 1 d . . .
C10 C 0.82817(19) 0.36554(15) 0.20487(8) 0.0241(4) Uani 1 1 d . . .
C11 C 0.9739(2) 0.32130(17) 0.22461(11) 0.0335(4) Uani 1 1 d . . .
C12 C 0.9650(2) 0.19480(16) 0.21665(9) 0.0284(4) Uani 1 1 d . . .
C13 C 0.83243(18) 0.17117(14) 0.17403(8) 0.0222(3) Uani 1 1 d . . .
C14 C 0.84672(19) 0.09757(14) 0.11137(8) 0.0226(4) Uani 1 1 d . . .
C15 C 0.70766(18) 0.10721(13) 0.07180(8) 0.0220(4) Uani 1 1 d . . .
C16 C 0.7030(2) 0.03378(15) 0.00853(9) 0.0271(4) Uani 1 1 d . . .
C17 C 0.5553(2) 0.02043(16) -0.02042(9) 0.0308(4) Uani 1 1 d . . .
C18 C 0.4523(2) -0.01187(16) 0.03510(10) 0.0311(4) Uani 1 1 d . . .
C19 C 0.46021(19) 0.07053(14) 0.09321(9) 0.0253(4) Uani 1 1 d . . .
C20 C 0.3652(2) 0.04276(17) 0.15219(11) 0.0317(4) Uani 1 1 d . . .
C21 C 0.71761(18) 0.30587(13) 0.09712(8) 0.0203(3) Uani 1 1 d . . .
C22 C 0.9746(2) 0.12155(14) 0.06586(8) 0.0245(4) Uani 1 1 d . . .
C23 C 1.1083(3) -0.2212(2) 0.08438(15) 0.0553(7) Uani 1 1 d . . .
H1 H 0.638(2) 0.4237(17) 0.0417(11) 0.037(6) Uiso 1 1 d . . .
H1A H 0.450(3) 0.3081(17) 0.1835(10) 0.040(6) Uiso 1 1 d . . .
H1B H 0.277(3) 0.290(2) 0.2001(11) 0.054(7) Uiso 1 1 d . . .
H1C H 0.335(3) 0.3220(19) 0.1226(12) 0.053(7) Uiso 1 1 d . . .
H2A H 0.242(2) 0.4845(16) 0.1802(9) 0.030(5) Uiso 1 1 d . . .
H2B H 0.354(2) 0.4690(17) 0.2423(10) 0.038(6) Uiso 1 1 d . . .
H3 H 0.638(2) 0.2423(17) 0.0156(10) 0.033(5) Uiso 1 1 d . . .
H3A H 0.4396(19) 0.5087(15) 0.1061(9) 0.022(4) Uiso 1 1 d . . .
H4 H 0.328(2) 0.6725(16) 0.1820(9) 0.030(5) Uiso 1 1 d . . .
H5 H 0.496(3) 0.802(2) 0.1766(11) 0.058(7) Uiso 1 1 d . . .
H5A H 0.997(4) -0.103(3) 0.0646(19) 0.126(14) Uiso 1 1 d . . .
H6A H 0.736(2) 0.7066(17) 0.1842(11) 0.040(6) Uiso 1 1 d . . .
H6B H 0.710(2) 0.7774(19) 0.1174(11) 0.044(6) Uiso 1 1 d . . .
H7A H 0.631(2) 0.6102(15) 0.0609(9) 0.024(5) Uiso 1 1 d . . .
H7B H 0.797(2) 0.6198(16) 0.0709(9) 0.028(5) Uiso 1 1 d . . .
H9A H 0.831(2) 0.5335(16) 0.2108(9) 0.028(5) Uiso 1 1 d . . .
H9B H 0.908(2) 0.4880(17) 0.1441(10) 0.039(6) Uiso 1 1 d . . .
H10 H 0.763(2) 0.3621(15) 0.2445(9) 0.023(5) Uiso 1 1 d . . .
H11A H 0.999(2) 0.3426(18) 0.2691(11) 0.045(6) Uiso 1 1 d . . .
H11B H 1.046(2) 0.3515(18) 0.1888(11) 0.043(6) Uiso 1 1 d . . .
H12A H 1.051(2) 0.1653(17) 0.1952(10) 0.038(6) Uiso 1 1 d . . .
H12B H 0.959(2) 0.1564(16) 0.2626(10) 0.036(5) Uiso 1 1 d . . .
H13 H 0.7614(19) 0.1367(14) 0.2020(9) 0.016(4) Uiso 1 1 d . . .
H14 H 0.8529(18) 0.0194(14) 0.1261(8) 0.015(4) Uiso 1 1 d . . .
H16A H 0.766(2) 0.0631(16) -0.0250(10) 0.027(5) Uiso 1 1 d . . .
H16B H 0.743(2) -0.0436(17) 0.0238(10) 0.036(5) Uiso 1 1 d . . .
H17A H 0.560(2) -0.0348(17) -0.0562(10) 0.034(5) Uiso 1 1 d . . .
H17B H 0.524(2) 0.0912(17) -0.0423(10) 0.035(5) Uiso 1 1 d . . .
H18A H 0.473(2) -0.0829(16) 0.0537(9) 0.032(5) Uiso 1 1 d . . .
H18B H 0.353(2) -0.0125(17) 0.0187(9) 0.037(5) Uiso 1 1 d . . .
H19 H 0.4327(18) 0.1466(15) 0.0745(8) 0.021(5) Uiso 1 1 d . . .
H20A H 0.387(2) 0.0944(18) 0.1904(11) 0.042(6) Uiso 1 1 d . . .
H20B H 0.384(2) -0.035(2) 0.1694(11) 0.052(7) Uiso 1 1 d . . .
H20C H 0.269(2) 0.0471(16) 0.1374(10) 0.032(5) Uiso 1 1 d . . .
H23A H 1.089(3) -0.287(2) 0.1150(13) 0.073(8) Uiso 1 1 d . . .
H23B H 1.169(5) -0.165(4) 0.111(2) 0.140(15) Uiso 1 1 d . . .
H23C H 1.153(3) -0.249(2) 0.0443(14) 0.069(8) Uiso 1 1 d . . .

loop_
  _atom_site_aniso_label
  _atom_site_aniso_U_11
  _atom_site_aniso_U_22
  _atom_site_aniso_U_33
  _atom_site_aniso_U_23
  _atom_site_aniso_U_13
  _atom_site_aniso_U_12
O1 0.0221(6) 0.0251(6) 0.0216(5) -0.0009(5) 0.0012(5) 0.0029(5)
O2 0.0231(6) 0.0254(6) 0.0211(6) 0.0020(5) -0.0001(5) -0.0012(5)
O3 0.0410(8) 0.0251(7) 0.0401(7) -0.0004(6) 0.0168(6) -0.0034(6)
O4 0.0360(7) 0.0238(6) 0.0360(7) 0.0018(5) 0.0130(6) 0.0057(6)
O5 0.0528(11) 0.0476(11) 0.1388(19) 0.0358(12) 0.0195(12) -0.0031(9)
N1 0.0259(8) 0.0196(7) 0.0204(7) 0.0003(6) -0.0021(6) 0.0021(6)
N2 0.0222(7) 0.0234(7) 0.0201(6) -0.0009(6) -0.0012(6) 0.0019(6)
N3 0.0282(8) 0.0199(7) 0.0189(7) 0.0005(6) -0.0036(6) 0.0004(6)
C1 0.0300(11) 0.0318(10) 0.0439(12) 0.0037(9) 0.0008(10) -0.0015(9)
C2 0.0218(10) 0.0335(10) 0.0403(11) 0.0014(9) 0.0022(8) 0.0045(8)
C3 0.0239(9) 0.0280(9) 0.0258(9) -0.0005(8) -0.0016(7) 0.0045(7)
C4 0.0342(11) 0.0310(10) 0.0320(10) 0.0025(8) 0.0041(9) 0.0111(8)
C5 0.0486(12) 0.0249(9) 0.0331(10) 0.0010(8) 0.0049(9) 0.0096(9)
C6 0.0413(12) 0.0214(9) 0.0339(10) -0.0024(8) 0.0013(9) -0.0004(9)
C7 0.0323(10) 0.0230(9) 0.0252(8) -0.0026(7) 0.0023(8) -0.0017(8)
C8 0.0241(9) 0.0222(8) 0.0225(8) -0.0035(7) 0.0015(7) 0.0012(7)
C9 0.0233(9) 0.0280(9) 0.0258(8) -0.0063(8) 0.0008(7) -0.0014(7)
C10 0.0226(9) 0.0294(9) 0.0203(8) -0.0041(7) -0.0016(7) -0.0006(7)
C11 0.0259(10) 0.0359(10) 0.0388(11) -0.0041(9) -0.0111(9) 0.0035(9)
C12 0.0268(9) 0.0329(10) 0.0255(9) 0.0009(8) -0.0048(8) 0.0045(8)
C13 0.0216(9) 0.0250(8) 0.0200(8) 0.0035(7) 0.0006(7) 0.0022(7)
C14 0.0259(9) 0.0207(8) 0.0213(8) 0.0045(7) 0.0008(7) 0.0016(7)
C15 0.0265(9) 0.0188(8) 0.0206(8) 0.0022(7) 0.0006(7) 0.0008(7)
C16 0.0381(11) 0.0211(9) 0.0220(8) 0.0001(7) 0.0008(8) 0.0012(8)
C17 0.0463(12) 0.0220(9) 0.0239(9) -0.0034(8) -0.0087(8) 0.0022(8)
C18 0.0354(11) 0.0224(9) 0.0354(10) 0.0004(8) -0.0101(9) -0.0023(8)
C19 0.0226(9) 0.0217(9) 0.0316(9) 0.0029(7) -0.0064(8) -0.0003(7)
C20 0.0248(10) 0.0304(10) 0.0397(11) 0.0045(9) -0.0002(8) -0.0015(8)
C21 0.0205(8) 0.0213(8) 0.0190(7) -0.0008(7) 0.0028(7) 0.0003(7)
C22 0.0277(9) 0.0242(8) 0.0216(8) 0.0024(7) 0.0029(7) 0.0019(7)
C23 0.078(2) 0.0302(12) 0.0578(16) 0.0075(12) 0.0056(15) 0.0061(12)

_geom_special_details
;
  All esds (except the esd in the dihedral angle between two l.s. planes)
  are estimated using the full covariance matrix.  The cell esds are taken
  into account individually in the estimation of esds in distances, angles
  and torsion angles; correlations between esds in cell parameters are only
  used when they are defined by crystal symmetry.  An approximate (isotropic)
  treatment of cell esds is used for estimating esds involving l.s. planes.
;

loop_
  _geom_bond_atom_site_label_1
  _geom_bond_atom_site_label_2
  _geom_bond_distance
  _geom_bond_site_symmetry_2
  _geom_bond_publ_flag
O1 C8 1.424(2) . ?
O1 C3 1.438(2) . ?
O2 C15 1.432(2) . ?
O2 C19 1.449(2) . ?
O3 C22 1.247(2) . ?
O4 C22 1.266(2) . ?
O5 C23 1.363(3) . ?
N1 C21 1.348(2) . ?
N1 C8 1.465(2) . ?
N2 C21 1.321(2) . ?
N2 C10 1.471(2) . ?
N2 C13 1.473(2) . ?
N3 C21 1.343(2) . ?
N3 C15 1.470(2) . ?
C1 C2 1.526(3) . ?
C2 C3 1.517(3) . ?
C3 C4 1.514(2) . ?
C4 C5 1.322(3) . ?
C5 C6 1.494(3) . ?
C6 C7 1.537(3) . ?
C7 C8 1.535(2) . ?
C8 C9 1.512(2) . ?
C9 C10 1.515(3) . ?
C10 C11 1.533(3) . ?
C11 C12 1.534(3) . ?
C12 C13 1.540(2) . ?
C13 C14 1.526(2) . ?
C14 C22 1.537(2) . ?
C14 C15 1.538(2) . ?
C15 C16 1.529(2) . ?
C16 C17 1.523(3) . ?
C17 C18 1.518(3) . ?
C18 C19 1.517(3) . ?
C19 C20 1.509(3) . ?

loop_
  _geom_angle_atom_site_label_1
  _geom_angle_atom_site_label_2
  _geom_angle_atom_site_label_3
  _geom_angle
  _geom_angle_site_symmetry_1
  _geom_angle_site_symmetry_3
  _geom_angle_publ_flag
C8 O1 C3 116.34(12) . . ?
C15 O2 C19 114.90(12) . . ?
C21 N1 C8 120.74(14) . . ?
C21 N2 C10 124.68(14) . . ?
C21 N2 C13 124.40(13) . . ?
C10 N2 C13 110.44(12) . . ?
C21 N3 C15 120.68(14) . . ?
C3 C2 C1 112.48(16) . . ?
O1 C3 C4 110.03(15) . . ?
O1 C3 C2 106.47(14) . . ?
C4 C3 C2 112.36(15) . . ?
C5 C4 C3 125.64(18) . . ?
C4 C5 C6 127.15(18) . . ?
C5 C6 C7 114.57(17) . . ?
C8 C7 C6 113.42(14) . . ?
O1 C8 N1 110.48(13) . . ?
O1 C8 C9 104.95(12) . . ?
N1 C8 C9 108.70(14) . . ?
O1 C8 C7 111.90(14) . . ?
N1 C8 C7 108.58(13) . . ?
C9 C8 C7 112.16(15) . . ?
C8 C9 C10 111.55(14) . . ?
N2 C10 C9 110.66(13) . . ?
N2 C10 C11 101.86(14) . . ?
C9 C10 C11 115.35(16) . . ?
C10 C11 C12 105.64(16) . . ?
C11 C12 C13 106.51(15) . . ?
N2 C13 C14 110.58(13) . . ?
N2 C13 C12 103.88(13) . . ?
C14 C13 C12 118.40(15) . . ?
C13 C14 C22 115.66(15) . . ?
C13 C14 C15 106.83(14) . . ?
C22 C14 C15 111.65(13) . . ?
O2 C15 N3 110.31(13) . . ?
O2 C15 C16 110.31(14) . . ?
N3 C15 C16 110.28(13) . . ?
O2 C15 C14 104.12(12) . . ?
N3 C15 C14 108.42(13) . . ?
C16 C15 C14 113.23(14) . . ?
C17 C16 C15 113.15(16) . . ?
C18 C17 C16 110.57(15) . . ?
C19 C18 C17 110.10(15) . . ?
O2 C19 C20 106.70(14) . . ?
O2 C19 C18 109.19(14) . . ?
C20 C19 C18 113.96(16) . . ?
N2 C21 N3 120.04(15) . . ?
N2 C21 N1 120.56(15) . . ?
N3 C21 N1 119.40(14) . . ?
O3 C22 O4 124.48(17) . . ?
O3 C22 C14 118.81(15) . . ?
O4 C22 C14 116.70(15) . . ?

loop_
  _geom_torsion_atom_site_label_1
  _geom_torsion_atom_site_label_2
  _geom_torsion_atom_site_label_3
  _geom_torsion_atom_site_label_4
  _geom_torsion
  _geom_torsion_site_symmetry_1
  _geom_torsion_site_symmetry_2
  _geom_torsion_site_symmetry_3
  _geom_torsion_site_symmetry_4
  _geom_torsion_publ_flag
C8 O1 C3 C4 -89.99(17) . . . . ?
C8 O1 C3 C2 148.01(14) . . . . ?
C1 C2 C3 O1 -65.0(2) . . . . ?
C1 C2 C3 C4 174.50(17) . . . . ?
O1 C3 C4 C5 35.5(3) . . . . ?
C2 C3 C4 C5 153.90(19) . . . . ?
C3 C4 C5 C6 5.2(3) . . . . ?
C4 C5 C6 C7 24.4(3) . . . . ?
C5 C6 C7 C8 -75.4(2) . . . . ?
C3 O1 C8 N1 -73.51(17) . . . . ?
C3 O1 C8 C9 169.49(13) . . . . ?
C3 O1 C8 C7 47.61(18) . . . . ?
C21 N1 C8 O1 -74.89(18) . . . . ?
C21 N1 C8 C9 39.8(2) . . . . ?
C21 N1 C8 C7 162.05(15) . . . . ?
C6 C7 C8 O1 43.9(2) . . . . ?
C6 C7 C8 N1 166.08(15) . . . . ?
C6 C7 C8 C9 -73.8(2) . . . . ?
O1 C8 C9 C10 63.48(17) . . . . ?
N1 C8 C9 C10 -54.73(18) . . . . ?
C7 C8 C9 C10 -174.81(14) . . . . ?
C21 N2 C10 C9 -14.0(2) . . . . ?
C13 N2 C10 C9 158.35(14) . . . . ?
C21 N2 C10 C11 -137.17(17) . . . . ?
C13 N2 C10 C11 35.21(18) . . . . ?
C8 C9 C10 N2 42.75(19) . . . . ?
C8 C9 C10 C11 157.68(15) . . . . ?
N2 C10 C11 C12 -30.03(19) . . . . ?
C9 C10 C11 C12 -149.92(16) . . . . ?
C10 C11 C12 C13 15.7(2) . . . . ?
C21 N2 C13 C14 18.8(2) . . . . ?
C10 N2 C13 C14 -153.63(14) . . . . ?
C21 N2 C13 C12 146.80(16) . . . . ?
C10 N2 C13 C12 -25.60(17) . . . . ?
C11 C12 C13 N2 5.00(19) . . . . ?
C11 C12 C13 C14 128.04(17) . . . . ?
N2 C13 C14 C22 75.47(18) . . . . ?
C12 C13 C14 C22 -44.1(2) . . . . ?
N2 C13 C14 C15 -49.49(17) . . . . ?
C12 C13 C14 C15 -169.11(14) . . . . ?
C19 O2 C15 N3 66.10(17) . . . . ?
C19 O2 C15 C16 -55.98(17) . . . . ?
C19 O2 C15 C14 -177.77(13) . . . . ?
C21 N3 C15 O2 72.99(19) . . . . ?
C21 N3 C15 C16 -164.92(15) . . . . ?
C21 N3 C15 C14 -40.4(2) . . . . ?
C13 C14 C15 O2 -57.74(16) . . . . ?
C22 C14 C15 O2 174.89(13) . . . . ?
C13 C14 C15 N3 59.71(16) . . . . ?
C22 C14 C15 N3 -67.66(17) . . . . ?
C13 C14 C15 C16 -177.58(14) . . . . ?
C22 C14 C15 C16 55.06(18) . . . . ?
O2 C15 C16 C17 49.22(18) . . . . ?
N3 C15 C16 C17 -72.87(19) . . . . ?
C14 C15 C16 C17 165.45(14) . . . . ?
C15 C16 C17 C18 -49.6(2) . . . . ?
C16 C17 C18 C19 53.9(2) . . . . ?
C15 O2 C19 C20 -174.96(14) . . . . ?
C15 O2 C19 C18 61.44(18) . . . . ?
C17 C18 C19 O2 -58.61(19) . . . . ?
C17 C18 C19 C20 -177.79(16) . . . . ?
C10 N2 C21 N3 176.02(15) . . . . ?
C13 N2 C21 N3 4.7(2) . . . . ?
C10 N2 C21 N1 -3.0(2) . . . . ?
C13 N2 C21 N1 -174.34(15) . . . . ?
C15 N3 C21 N2 7.2(2) . . . . ?
C15 N3 C21 N1 -173.74(15) . . . . ?
C8 N1 C21 N2 -11.0(2) . . . . ?
C8 N1 C21 N3 169.94(14) . . . . ?
C13 C14 C22 O3 -33.8(2) . . . . ?
C15 C14 C22 O3 88.60(19) . . . . ?
C13 C14 C22 O4 147.46(16) . . . . ?
C15 C14 C22 O4 -90.10(18) . . . . ?

_diffrn_measured_fraction_theta_max    0.984
_diffrn_reflns_theta_full              28.29
_diffrn_measured_fraction_theta_full   0.984
_refine_diff_density_max    0.245
_refine_diff_density_min   -0.203
_refine_diff_density_rms    0.040

#===END
